# Supplementary material for: Effects of cowpea mild mottle virus on soybean cultivars in Brazil
Source: PeerJ. 2020 Aug 31;8:e9828. doi: 10.7717/peerj.9828 (PMC7469931; doi:10.7717/peerj.9828)
Supplement: Supplemental Information 3 — Each tab contains the raw data collected for each field and the data about the season 2017/2018. [file peerj-08-9828-s003.xlsx]

## Sheet: Botucatu SP
station=TRMM.980 (9002425)							Botucatu
Botucatu (3507506)							Month	Rainfall (mm)	Max (°C)	Average (°C)	Min (°C)
latitude=-22,75							Oct	169.6	31.5	25.97	20.51
longitude=-48,5							Nov	134.98	29.4	24.4	19.4
altitude=526,0m							Dec	102.98	30.13	25.55	20.95
							Jan	164.16	28.61	24.9	21.2
* variables calculated by the system							Feb	82.56	29.05	24.5	19.85
							Mar	142.18	30.5	26.05	21.65
Date	tMin	tMed	tMax	Rainfall (mm)			Apr	19.28	28.1	23.2	18.25
Mean April 2018	18.2333	23.1667	28.1	19.28
2018-04-30	18	22.5	27	0
2018-04-29	19	23	27	0
2018-04-28	19	25	31	0
2018-04-27	19	24	29	0
2018-04-26	18	23.5	29	0
2018-04-25	18	23.5	29	0
2018-04-24	17	22.5	28	0
2018-04-23	17	22.5	28	0
2018-04-22	15	21.5	28	0
2018-04-21	16	21.5	27	0
2018-04-20	17	22.5	28	0.98
2018-04-19	16	22	28	0
2018-04-18	16	21.5	27	0
2018-04-17	17	22	27	0
2018-04-16	20	21.5	23	0.28
2018-04-15	18	21	24	0.38
2018-04-14	19	24	29	0.28
2018-04-13	19	24.5	30	0
2018-04-12	17	22.5	28	0.23
2018-04-11	18	23	28	0
2018-04-10	19	24	29	0
2018-04-09	19	24	29	0
2018-04-08	19	24	29	0
2018-04-07	18	24	30	0
2018-04-06	19	24	29	0
2018-04-05	19	24.5	30	0
2018-04-04	19	24	29	0
2018-04-03	20	24	28	2
2018-04-02	21	24.5	28	4.4
2018-04-01	21	24	27	10.73
Médias Mar 2018	21.6452	26.0323	30.4194	142.18
2018-03-31	21	24.5	28	0.38
2018-03-30	20	25	30	7.98
2018-03-29	20	24.5	29	0
2018-03-28	21	25	29	0.1
2018-03-27	20	24	28	2.38
2018-03-26	21	24.5	28	8.98
2018-03-25	21	25.5	30	0
2018-03-24	22	26	30	0.13
2018-03-23	21	26	31	0
2018-03-22	21	25.5	30	2.6
2018-03-21	23	27	31	39.48
2018-03-20	23	26.5	30	3.5
2018-03-19	22	25.5	29	0.48
2018-03-18	21	26.5	32	0
2018-03-17	22	27	32	3.05
2018-03-16	24	27.5	31	20.48
2018-03-15	23	26.5	30	10.08
2018-03-14	23	27.5	32	0.48
2018-03-13	22	26.5	31	1.53
2018-03-12	22	26.5	31	0
2018-03-11	21	25.5	30	0
2018-03-10	21	26	31	4.73
2018-03-09	19	24.5	30	0
2018-03-08	22	27.5	33	0
2018-03-07	23	28	33	6.95
2018-03-06	22	26.5	31	0.03
2018-03-05	21	26	31	0.05
2018-03-04	21	25	29	0.38
2018-03-03	23	27	31	1.4
2018-03-02	23	27	31	19.83
2018-03-01	22	26.5	31	7.18
Mean Feb 2018	19.8571	24.4464	29.0357	82.56
2018-02-28	21	26	31	0.08
2018-02-27	21	24.5	28	0.3
2018-02-26	21	24.5	28	3.05
2018-02-25	20	23.5	27	0.98
2018-02-24	18	24	30	0
2018-02-23	20	25	30	0
2018-02-22	21	26	31	0
2018-02-21	22	25.5	29	0
2018-02-20	20	24.5	29	11.4
2018-02-19	21	24	27	1.35
2018-02-18	21	24.5	28	9.98
2018-02-17	19	24	29	9.6
2018-02-16	20	24	28	0.45
2018-02-15	19	23	27	7.23
2018-02-14	18	20.5	23	8.85
2018-02-13	21	24.5	28	4.45
2018-02-12	22	25.5	29	0.1
2018-02-11	22	25	28	11.13
2018-02-10	23	27.5	32	13.05
2018-02-09	20	26.5	33	0
2018-02-08	19	25.5	32	0
2018-02-07	18	24	30	0.38
2018-02-06	19	24	29	0
2018-02-05	18	22.5	27	0
2018-02-04	17	23	29	0
2018-02-03	19	24.5	30	0
2018-02-02	18	24.5	31	0.18
2018-02-01	18	24	30	0
Mean Jan 2018	21.1613	24.8871	28.6129	164.16
2018-01-31	19	24	29	0
2018-01-30	22	25	28	1.28
2018-01-29	21	24.5	28	17.7
2018-01-28	20	24	28	0.9
2018-01-27	20	24	28	0
2018-01-26	22	25	28	0
2018-01-25	23	27	31	5.43
2018-01-24	22	26.5	31	35
2018-01-23	23	27	31	5.28
2018-01-22	22	25.5	29	3.48
2018-01-21	21	24.5	28	4.98
2018-01-20	22	27	32	9.7
2018-01-19	21	25	29	0.35
2018-01-18	22	25.5	29	3.68
2018-01-17	22	25	28	3.13
2018-01-16	22	25.5	29	9.5
2018-01-15	21	24.5	28	0.45
2018-01-14	21	25	29	4.1
2018-01-13	20	24.5	29	1.08
2018-01-12	21	24	27	13.4
2018-01-11	21	25	29	6.8
2018-01-10	20	24	28	0.48
2018-01-09	20	22	24	10.75
2018-01-08	18	20	22	7.43
2018-01-07	22	23.5	25	1
2018-01-06	22	26	30	8.25
2018-01-05	20	25.5	31	0
2018-01-04	19	25	31	0
2018-01-03	22	25.5	29	3.48
2018-01-02	23	26	29	5.73
2018-01-01	22	26	30	0.8
Mean Dec 2017	20.9355	25.5323	30.129	102.98
2017-12-31	22	25.5	29	3.65
2017-12-30	22	25	28	34.33
2017-12-29	22	26	30	9.98
2017-12-28	21	25.5	30	1.73
2017-12-27	21	25.5	30	0.1
2017-12-26	21	26	31	0.48
2017-12-25	20	22.5	25	6.13
2017-12-24	22	25	28	2.88
2017-12-23	22	25.5	29	1.15
2017-12-22	22	25	28	3.45
2017-12-21	22	25	28	21.35
2017-12-20	21	25	29	8.9
2017-12-19	22	26	30	1.43
2017-12-18	22	26.5	31	4.28
2017-12-17	22	26.5	31	0.18
2017-12-16	21	26	31	0.03
2017-12-15	21	27.5	34	1.78
2017-12-14	19	24.5	30	0
2017-12-13	19	24	29	0
2017-12-12	20	24.5	29	0
2017-12-11	21	27	33	0.18
2017-12-10	20	25.5	31	0.45
2017-12-09	20	26	32	0
2017-12-08	21	25	29	0.13
2017-12-07	21	25	29	0.28
2017-12-06	22	27.5	33	0
2017-12-05	22	28	34	0
2017-12-04	21	26.5	32	0
2017-12-03	19	25	31	0.03
2017-12-02	19	24.5	30	0
2017-12-01	19	24.5	30	0.08
Mean Nov 2017	19.4	24.4	29.4	134.98
2017-11-30	19	24	29	0.18
2017-11-29	18	24	30	0
2017-11-28	21	25.5	30	0
2017-11-27	22	25	28	13.6
2017-11-26	22	26	30	6.3
2017-11-25	21	26.5	32	0
2017-11-24	19	25.5	32	0
2017-11-23	18	22	26	0
2017-11-22	20	25.5	31	15.8
2017-11-21	21	25.5	30	13.9
2017-11-20	19	23.5	28	0
2017-11-19	22	24.5	27	0
2017-11-18	22	26	30	4
2017-11-17	22	27.5	33	0.5
2017-11-16	22	28	34	5.3
2017-11-15	19	26	33	0
2017-11-14	16	23.5	31	0
2017-11-13	16	23	30	0
2017-11-12	19	24.5	30	0
2017-11-11	21	25	29	1.8
2017-11-10	21	23.5	26	5.6
2017-11-09	20	24	28	0.2
2017-11-08	18	23	28	3.7
2017-11-07	17	22	27	0
2017-11-06	16	19	22	0
2017-11-05	21	25	29	3.8
2017-11-04	20	26	32	59.1
2017-11-03	17	24	31	1.2
2017-11-02	16	22	28	0
2017-11-01	17	22.5	28	0
Mean Oct 2017	20.5161	25.9677	31.4194	169.6		Botucatu
2017-10-31	20	24.5	29	5		Month	Rainfall (mm)	Medium	Max	Min
2017-10-30	21	22.5	24	22		Oct	169.6	25.97	31.5	20.51
2017-10-29	22	25	28	8.4		Nov	134.98	24.4	29.4	19.4
2017-10-28	20	26	32	7.6		Dec	102.98	25.55	30.13	20.95
2017-10-27	21	24.5	28	21		Jan	164.16	24.9	28.61	21.2
2017-10-26	21	27	33	15.6		Feb	82.56	24.5	29.05	19.85
2017-10-25	19	26	33	0.1		Mar	142.18	26.05	30.5	24.65
2017-10-24	17	24	31	0.1		April	19.28	23.2	28.1	18.25
2017-10-23	18	21	24	1.1
2017-10-22	21	24.5	28	5.5
2017-10-21	22	28	34	5.5
2017-10-20	23	27	31	0.5
2017-10-19	23	28.5	34	0.1
2017-10-18	21	27	33	0
2017-10-17	20	25.5	31	0
2017-10-16	19	23.5	28	0
2017-10-15	18	25.5	33	0
2017-10-14	22	29.5	37	0
2017-10-13	21	29	37	0.4
2017-10-12	22	29.5	37	0
2017-10-11	24	30	36	0
2017-10-10	23	28.5	34	0
2017-10-09	22	28	34	0
2017-10-08	20	26	32	0.1
2017-10-07	22	27	32	41.3
2017-10-06	22	28	34	0
2017-10-05	18	26	34	0
2017-10-04	16	22	28	0.4
2017-10-03	18	22.5	27	0
2017-10-02	21	24	27	34.8
2017-10-01	19	25	31	0.1

## Sheet: Mogi Mirim SP
Station=ITAPIRA (9000428)							Mogi Mirim -SP
municipio=Itapira (3522604)								Rainfall (mm)	Max (°C)	Average (°C)	Min (°C)
latitude=-22,415							Oct	149.2	30.6	24.5	18.32
longitude=-46,8053							Nov	206.4	29.8	23.7	17.62
altitude=634,0m							Dec	150	30.7	25.1	19.4
							Jan	222.2	29.9	24.75	19.6
* variables calculated by the system							Feb	85.4	30.15	24.4	18.62
							Mar	87.9	31.92	25.8	19.6
Date	tMin	tMed	tMax	Rainfall (mm)			Apr	28.4	29.6	22.7	15.8
Mean Apr 2018	15.78	22.6767	29.5733	28.4
2018-04-30	15	22.85	30.7	0
2018-04-29	14.8	23.1	31.4	0
2018-04-28	16	23.8	31.6	0.2
2018-04-27	15.3	23.05	30.8	3.6
2018-04-26	14.6	22.65	30.7	0
2018-04-25	15.4	22.95	30.5	0.2
2018-04-24	13.5	21.5	29.5	0
2018-04-23	16	21.5	27	0
2018-04-22	14.2	21.35	28.5	0.2
2018-04-21	9.6	18.8	28	0
2018-04-20	13.5	20.45	27.4	0
2018-04-19	11.7	20.1	28.5	0
2018-04-18	12.5	20.45	28.4	0.2
2018-04-17	13.3	20.35	27.4	0
2018-04-16	15.7	21.3	26.9	6
2018-04-15	17.1	23.25	29.4	0
2018-04-14	17.5	23.55	29.6	0
2018-04-13	16.9	24	31.1	0
2018-04-12	16.5	23.05	29.6	0.2
2018-04-11	15.7	23.05	30.4	0
2018-04-10	16.8	23.75	30.7	0.4
2018-04-09	18.1	24.5	30.9	0.6
2018-04-08	17.1	23.85	30.6	0
2018-04-07	16.4	23.9	31.4	0
2018-04-06	15.6	23.3	31	0
2018-04-05	16.4	23.35	30.3	0.2
2018-04-04	18.3	23.6	28.9	0
2018-04-03	19.8	24.1	28.4	8.8
2018-04-02	20.6	24.35	28.1	0.2
2018-04-01	19.5	24.5	29.5	7.6
Mean Mar 2018	19.571	25.7468	31.9226	87.9
2018-03-31	17.5	24.2	30.9	4.8
2018-03-30	17.4	24.5	31.6	13.2
2018-03-29	18	24.95	31.9	0
2018-03-28	17.6	24.5	31.4	0
2018-03-27	19.6	25.55	31.5	0
2018-03-26	19.1	25.05	31	0
2018-03-25	18.4	25.1	31.8	0
2018-03-24	19.1	25.05	31	0
2018-03-23	18.9	25.85	32.8	0
2018-03-22	18.9	24.7	30.5	27.2
2018-03-21	20	25.2	30.4	10.4
2018-03-20	20.8	26.8	32.8	0.6
2018-03-19	20.2	27.1	34	0
2018-03-18	18.5	25.9	33.3	0
2018-03-17	19.2	25.85	32.5	0.2
2018-03-16	21.4	26.7	32	5
2018-03-15	21.4	27.5	33.6	2.6
2018-03-14	21.1	27.75	34.4	0
2018-03-13	21.2	27.6	34	0
2018-03-12	18.8	25.75	32.7	0
2018-03-11	18.7	25.25	31.8	0
2018-03-10	20.4	25.9	31.4	1
2018-03-09	18.6	25	31.4	0
2018-03-08	21.8	26	30.2	4.8
2018-03-07	20.7	26.05	31.4	2.8
2018-03-06	19.5	26.1	32.7	1.8
2018-03-05	19.6	26.25	32.9	0
2018-03-04	20	24	28	1.3
2018-03-03	19.4	25	30.6	4
2018-03-02	20.3	26.3	32.3	0.4
2018-03-01	20.6	26.7	32.8	7.8
Mean Feb 2018	18.6286	24.3875	30.1464	85.4
2018-02-28	19.3	25.8	32.3	0
2018-02-27	19.6	24.2	28.8	5.8
2018-02-26	20.3	23.55	26.8	4.8
2018-02-25	17.4	24.5	31.6	0
2018-02-24	18.7	24.75	30.8	0.6
2018-02-23	19.1	25.4	31.7	0
2018-02-22	18.5	25	31.5	0
2018-02-21	20.5	25.3	30.1	12
2018-02-20	20	24.7	29.4	3
2018-02-19	17.9	22.95	28	0
2018-02-18	19.3	23	26.7	23.2
2018-02-17	17.4	24.15	30.9	2.8
2018-02-16	17.1	24.15	31.2	0
2018-02-15	19.6	23.5	27.4	0
2018-02-14	18.5	22.95	27.4	0
2018-02-13	20.9	25.2	29.5	6.8
2018-02-12	21.1	26.5	31.9	0.8
2018-02-11	19.7	26.3	32.9	0
2018-02-10	20.2	24.2	28.2	25.6
2018-02-09	17.3	25.95	34.6	0
2018-02-08	16	24.3	32.6	0
2018-02-07	16.8	23.65	30.5	0
2018-02-06	18.1	23	27.9	0
2018-02-05	18.1	23.4	28.7	0
2018-02-04	17.4	23.1	28.8	0
2018-02-03	18.8	25.25	31.7	0
2018-02-02	18.6	24.7	30.8	0
2018-02-01	15.4	23.4	31.4	0
Mean Jan 2018	19.5871	24.7419	29.8968	222.2
2018-01-31	16.3	22.75	29.2	0
2018-01-30	21.1	23.25	25.4	13.6
2018-01-29	20.9	25.4	29.9	21.6
2018-01-28	21.2	26.45	31.7	0
2018-01-27	21.1	26.2	31.3	41.8
2018-01-26	20.1	25.8	31.5	0
2018-01-25	19.6	26.25	32.9	2.8
2018-01-24	20.1	25.7	31.3	0
2018-01-23	19.1	26.5	33.9	30.2
2018-01-22	19.9	26.3	32.7	9.8
2018-01-21	21.2	25.95	30.7	0
2018-01-20	19.9	25.35	30.8	6.4
2018-01-19	20.7	26.75	32.8	0
2018-01-18	20.4	26.8	33.2	0
2018-01-17	19.4	25.9	32.4	1.8
2018-01-16	19.5	24.7	29.9	1.8
2018-01-15	20.3	25.45	30.6	3.4
2018-01-14	19.5	25.3	31.1	0.8
2018-01-13	18.2	23.4	28.6	9.4
2018-01-12	18.7	21.55	24.4	5.4
2018-01-11	19.5	25.6	31.7	7.6
2018-01-10	17.6	24.05	30.5	0
2018-01-09	18.7	23.35	28	0
2018-01-08	19.1	21.3	23.5	9.8
2018-01-07	18.2	21.2	24.2	34.8
2018-01-06	20.2	23.95	27.7	5
2018-01-05	18.2	24.85	31.5	0
2018-01-04	17.9	25	32.1	2
2018-01-03	20.7	23.3	25.9	5.8
2018-01-02	19.6	23.75	27.9	8.4
2018-01-01	20.3	24.9	29.5	0
Mean Dec 2017	19.3903	25.0306	30.671	150
2017-12-31	19.8	22.95	26.1	13.4
2017-12-30	19.8	22.55	25.3	32.4
2017-12-29	20.6	24.5	28.4	1.8
2017-12-28	20.7	26.95	33.2	0
2017-12-27	21	27.1	33.2	0
2017-12-26	19.5	25.75	32	1
2017-12-25	20.6	26.65	32.7	2.4
2017-12-24	19.5	25.7	31.9	0.2
2017-12-23	19.1	24.4	29.7	3.2
2017-12-22	20.4	22.95	25.5	22
2017-12-21	20.2	23.1	26	2.4
2017-12-20	18.7	25.3	31.9	3.6
2017-12-19	19.1	26.45	33.8	28.4
2017-12-18	20.6	26.9	33.2	0
2017-12-17	19.6	26.1	32.6	0
2017-12-16	19	25.85	32.7	0
2017-12-15	20.4	25.95	31.5	0.4
2017-12-14	17.7	25	32.3	0
2017-12-13	17.3	24.45	31.6	0
2017-12-12	19.9	25.35	30.8	1.8
2017-12-11	18.6	26.15	33.7	0
2017-12-10	18	24.7	31.4	0
2017-12-09	18.1	24.9	31.7	0
2017-12-08	20.4	25.6	30.8	0.2
2017-12-07	20.7	23.95	27.2	6.8
2017-12-06	20.2	25.95	31.7	23.4
2017-12-05	20	27.1	34.2	0
2017-12-04	19.1	26	32.9	0
2017-12-03	17.2	23.75	30.3	0
2017-12-02	17.1	22.55	28	0
2017-12-01	18.2	21.35	24.5	6.6
Mean Nov 2017	17.62	23.695	29.77	206.4
2017-11-30	16.3	23.3	30.3	6
2017-11-29	15.7	23.2	30.7	0
2017-11-28	18.5	24.85	31.2	0
2017-11-27	20	23.9	27.8	16.8
2017-11-26	19.8	23.15	26.5	0
2017-11-25	18.1	25.75	33.4	0
2017-11-24	17.3	24.4	31.5	0
2017-11-23	17.2	23.35	29.5	0
2017-11-22	20	23.65	27.3	34.8
2017-11-21	20.4	24.85	29.3	25.4
2017-11-20	20.4	24.15	27.9	24.6
2017-11-19	20	23.7	27.4	1
2017-11-18	19.5	24.85	30.2	3.2
2017-11-17	18	24.65	31.3	3.2
2017-11-16	16.1	24.55	33	15.6
2017-11-15	18	25.65	33.3	0.2
2017-11-14	12.1	22.35	32.6	0
2017-11-13	12.5	21.3	30.1	0
2017-11-12	14.7	21.65	28.6	0.2
2017-11-11	19.2	23.75	28.3	43.6
2017-11-10	18.2	24.8	31.4	15.4
2017-11-09	19.9	24.9	29.9	0
2017-11-08	16.4	22.75	29.1	0
2017-11-07	18.1	23.3	28.5	0
2017-11-06	17.8	23.2	28.6	0
2017-11-05	18.2	21.5	24.8	14.8
2017-11-04	20.1	24.85	29.6	1.4
2017-11-03	16.6	24.15	31.7	0
2017-11-02	15.5	23.1	30.7	0.2
2017-11-01	14	21.3	28.6	0
Mean Oct 2017	18.3258	24.45	30.5742	149.2
2017-10-31	18.8	22.85	26.9	0
2017-10-30	18.9	23.65	28.4	25.2
2017-10-29	19.9	23.05	26.2	9.2
2017-10-28	17.6	23.9	30.2	10
2017-10-27	18.7	25.15	31.6	28.2
2017-10-26	17.8	22.55	27.3	12.8
2017-10-25	17.3	25.85	34.4	0
2017-10-24	15	23.2	31.4	0
2017-10-23	18.1	21.4	24.7	0.6
2017-10-22	19.7	21.3	22.9	8
2017-10-21	20	25.7	31.4	0
2017-10-20	19.7	26.1	32.5	0.6
2017-10-19	19	26.8	34.6	0.2
2017-10-18	20.9	27.25	33.6	0
2017-10-17	18.9	25.05	31.2	0
2017-10-16	17.2	24.15	31.1	0
2017-10-15	20.2	25.95	31.7	0
2017-10-14	19.3	27.2	35.1	0
2017-10-13	18.2	27.4	36.6	0
2017-10-12	17.9	27	36.1	0
2017-10-11	19.4	27.1	34.8	11.2
2017-10-10	18.9	27.4	35.9	0.2
2017-10-09	18.8	26.1	33.4	0
2017-10-08	17.9	24.75	31.6	0
2017-10-07	20.1	21.8	23.5	0.6
2017-10-06	19.3	27.1	34.9	0
2017-10-05	16.5	24.85	33.2	0
2017-10-04	15	21.35	27.7	0
2017-10-03	16.9	20.2	23.5	2.4
2017-10-02	16.7	19.65	22.6	33.6
2017-10-01	15.5	22.15	28.8	6.4

## Sheet: Planaltina DF
Month	Rainfall (mm)	Max (°C)	Average (°C)	Min (°C)
Oct	16.6	32.9	26.2	20.7
Nov	330.8	28.2	23.2	19.6
Dec	190	28	23.3	19.8
Jan	129.2	29.1	23.6	19.6
Feb	198.3	27.9	23.1	19.4
Mar	279.4	29.2	23.9	20.1
Apr	99.4	27	22.2	18.6
Source: Inmet

## Sheet: Pedra Preta MT
station=TRMM.2555 (9006822)							Pedra Preta
municipio=Pedra Preta (5106372)							Month	Rainfall (mm)	Max (°C)	Average (°C)	Min (°C)
latitude=-17,0							Oct	285.4	36.22	29.97	23.7
longitude=-54,5							Nov	188.53	32.5	27.75	23
altitude=443,0m							Dec	180.7	33.22	28.15	23.06
							Jan	255.02	32.9	28.01	23.13
* variables calculated by the system							Feb	217.13	31.6	27.15	22.7
							Mar	226.95	32.7	27.9	23.1
Date	tMin	tMed	tMax	Rainfall (mm)			Apr	62.51	32.2	27	21.6
Mean Apr 2018	21.6667	26.9333	32.2	62.51
2018-04-30	22	27	32	0
2018-04-29	22	28	34	0.2
2018-04-28	22	28	34	0
2018-04-27	22	27.5	33	0
2018-04-26	22	27.5	33	0
2018-04-25	21	27	33	0
2018-04-24	20	26.5	33	0
2018-04-23	20	27	34	0
2018-04-22	20	26.5	33	0
2018-04-21	21	26	31	4.18
2018-04-20	20	25.5	31	2.85
2018-04-19	22	25	28	4.63
2018-04-18	22	26.5	31	0.85
2018-04-17	21	24.5	28	4.13
2018-04-16	21	25	29	1.28
2018-04-15	21	26	31	8.08
2018-04-14	21	26.5	32	0
2018-04-13	21	27	33	0.3
2018-04-12	22	27.5	33	0
2018-04-11	22	27.5	33	0
2018-04-10	22	27.5	33	0
2018-04-09	22	28	34	1.33
2018-04-08	22	28	34	0.03
2018-04-07	23	28.5	34	0.28
2018-04-06	22	28	34	1.78
2018-04-05	23	27.5	32	2.8
2018-04-04	23	27.5	32	0.28
2018-04-03	23	27.5	32	2.95
2018-04-02	22	26.5	31	11.88
2018-04-01	23	27	31	14.68
Mean Mar 2018	23.0645	27.871	32.6774	226.95
2018-03-31	23	26.5	30	4.7
2018-03-30	22	27.5	33	18.18
2018-03-29	23	27	31	34.83
2018-03-28	22	26.5	31	49.08
2018-03-27	22	26	30	34.68
2018-03-26	23	26.5	30	11.98
2018-03-25	23	27	31	1.1
2018-03-24	24	28.5	33	1.18
2018-03-23	23	28.5	34	0.9
2018-03-22	24	28	32	0.28
2018-03-21	23	27.5	32	4.03
2018-03-20	23	29	35	1.43
2018-03-19	22	28.5	35	0.53
2018-03-18	24	29	34	13.18
2018-03-17	24	29	34	7.7
2018-03-16	23	28	33	0.55
2018-03-15	23	26.5	30	1
2018-03-14	24	28	32	2.78
2018-03-13	23	28	33	0
2018-03-12	23	28	33	2.05
2018-03-11	24	28	32	17.8
2018-03-10	24	28	32	1.03
2018-03-09	24	29.5	35	10.5
2018-03-08	22	28	34	0.98
2018-03-07	22	28	34	0.1
2018-03-06	22	28	34	0.35
2018-03-05	24	28	32	1.23
2018-03-04	24	28	32	0
2018-03-03	23	28.5	34	1.3
2018-03-02	23	28.5	34	0
2018-03-01	22	28	34	3.5
Mean Feb 2018	22.6786	27.1429	31.6071	217.13
2018-02-28	23	27.5	32	0.88
2018-02-27	22	27	32	1.58
2018-02-26	22	26	30	31.2
2018-02-25	22	26.5	31	5
2018-02-24	22	25	28	2.63
2018-02-23	23	27	31	1.48
2018-02-22	23	26	29	9.83
2018-02-21	23	26.5	30	7.68
2018-02-20	23	27	31	6.85
2018-02-19	22	25	28	16.4
2018-02-18	23	27.5	32	2.53
2018-02-17	22	28.5	35	0.6
2018-02-16	22	27	32	0
2018-02-15	22	29	36	40.3
2018-02-14	23	29	35	3.98
2018-02-13	23	27.5	32	2.73
2018-02-12	23	26.5	30	2.18
2018-02-11	24	27	30	5.98
2018-02-10	24	26	28	18.88
2018-02-09	22	26.5	31	11.38
2018-02-08	23	28	33	3
2018-02-07	22	28	34	0
2018-02-06	22	27	32	0.1
2018-02-05	22	28	34	4.23
2018-02-04	22	28	34	2.73
2018-02-03	23	26.5	30	8.8
2018-02-02	25	29	33	25.53
2018-02-01	23	27.5	32	0.65
Mean Jan 2018	23.129	28.0161	32.9032	255.02
2018-01-31	24	28.5	33	5.43
2018-01-30	24	28	32	2.2
2018-01-29	24	26.5	29	36.65
2018-01-28	23	26.5	30	0
2018-01-27	23	28	33	9.93
2018-01-26	24	28.5	33	24.15
2018-01-25	24	30	36	9.18
2018-01-24	24	30	36	1.33
2018-01-23	24	29.5	35	1.25
2018-01-22	24	28.5	33	1.23
2018-01-21	24	28.5	33	0
2018-01-20	24	30.5	37	0.18
2018-01-19	23	30	37	1.85
2018-01-18	21	27.5	34	2.25
2018-01-17	23	28.5	34	4.65
2018-01-16	23	28.5	34	8.75
2018-01-15	23	28	33	9.4
2018-01-14	22	27.5	33	0.98
2018-01-13	23	27.5	32	1.85
2018-01-12	23	28.5	34	1.58
2018-01-11	22	28	34	5.4
2018-01-10	22	27.5	33	2.48
2018-01-09	22	25.5	29	19.35
2018-01-08	23	26	29	1.03
2018-01-07	22	26.5	31	27.18
2018-01-06	23	26	29	14.93
2018-01-05	23	28	33	21.2
2018-01-04	22	28	34	3.53
2018-01-03	23	26.5	30	14.18
2018-01-02	24	29	34	22.9
2018-01-01	24	28.5	33	0
Mean Dez 2017	23.0645	28.1452	33.2258	180.7
2017-12-31	24	28.5	33	0
2017-12-30	25	30	35	4.63
2017-12-29	24	30.5	37	1.33
2017-12-28	24	31	38	5.78
2017-12-27	23	29.5	36	2.43
2017-12-26	23	28.5	34	1.78
2017-12-25	23	28	33	3.08
2017-12-24	23	26.5	30	0.5
2017-12-23	23	27.5	32	1
2017-12-22	24	29	34	7.95
2017-12-21	24	29	34	6.08
2017-12-20	23	29	35	2.25
2017-12-19	22	28.5	35	0.98
2017-12-18	23	27.5	32	0
2017-12-17	23	28	33	0.05
2017-12-16	23	28	33	0.88
2017-12-15	23	28.5	34	0.13
2017-12-14	23	28.5	34	1.95
2017-12-13	22	27	32	0
2017-12-12	21	27.5	34	0
2017-12-11	22	28	34	4.98
2017-12-10	23	27	31	13.3
2017-12-09	24	28	32	31.28
2017-12-08	24	27.5	31	18.38
2017-12-07	22	26	30	4.05
2017-12-06	24	29	34	30.05
2017-12-05	21	27	33	2.33
2017-12-04	24	27	30	12.45
2017-12-03	23	27.5	32	2.08
2017-12-02	22	27.5	33	2.05
2017-12-01	23	27.5	32	18.95
Mean Nov 2017	23	27.75	32.5	188.53
2017-11-30	21	23	25	28.53
2017-11-29	20	23.5	27	0
2017-11-28	22	26.5	31	2.6
2017-11-27	24	29	34	0.1
2017-11-26	24	27.5	31	8.4
2017-11-25	24	28.5	33	2.1
2017-11-24	22	27	32	0
2017-11-23	23	29	35	0
2017-11-22	23	26.5	30	2
2017-11-21	24	27.5	31	23.5
2017-11-20	23	27	31	1.8
2017-11-19	23	26.5	30	23.7
2017-11-18	23	27.5	32	2.4
2017-11-17	25	29.5	34	6.9
2017-11-16	23	29.5	36	2.4
2017-11-15	22	29	36	0
2017-11-14	22	30	38	0
2017-11-13	20	27	34	0
2017-11-12	22	26.5	31	0
2017-11-11	22	26	30	3.4
2017-11-10	22	27.5	33	45.9
2017-11-09	24	28.5	33	0.4
2017-11-08	22	28	34	1.1
2017-11-07	24	27.5	31	6.5
2017-11-06	25	28.5	32	8.4
2017-11-05	26	32	38	17.6
2017-11-04	25	30.5	36	0.5
2017-11-03	26	30.5	35	0.2
2017-11-02	23	27	31	0
2017-11-01	21	26	31	0.1
Mean Oct 2017	23.7097	29.9677	36.2258	285.4
2017-10-31	21	25.5	30	8.2
2017-10-30	22	28	34	0
2017-10-29	24	31	38	5
2017-10-28	24	31.5	39	64.7
2017-10-27	27	34	41	0
2017-10-26	22	28.5	35	0
2017-10-25	21	26.5	32	0
2017-10-24	24	30.5	37	0
2017-10-23	24	30	36	0
2017-10-22	25	31.5	38	15.8
2017-10-21	23	31.5	40	73.3
2017-10-20	22	31	40	7.9
2017-10-19	22	31	40	0
2017-10-18	22	31.5	41	25.6
2017-10-17	23	32	41	3.7
2017-10-16	21	26	31	7.4
2017-10-15	25	29.5	34	0
2017-10-14	26	29	32	0
2017-10-13	27	32.5	38	7
2017-10-12	27	32.5	38	0
2017-10-11	25	32	39	0
2017-10-10	25	31.5	38	3.7
2017-10-09	28	32.5	37	42.9
2017-10-08	26	32.5	39	0
2017-10-07	27	33	39	1.2
2017-10-06	24	30	36	5.4
2017-10-05	22	28.5	35	1.5
2017-10-04	22	25.5	29	0
2017-10-03	21	25	29	2
2017-10-02	20	27.5	35	9.8
2017-10-01	23	27.5	32	0.3
