# Supplementary material for: Effects of cowpea mild mottle virus on soybean cultivars in Brazil
Source: PeerJ. 2020 Aug 31;8:e9828. doi: 10.7717/peerj.9828 (PMC7469931; doi:10.7717/peerj.9828)
Supplement: Supplemental Information 4 — These data were used for statistical analysis to compare the agronomic traits for each cultivar. [file peerj-08-9828-s004.xlsx]

## Sheet: Field 1 Botucatu
	BMX POTÊNCIA RR
		Plant Height (cm)	N° pods per plant
T1	R1.1	79	105						1,000-graind weight (g)	Yield (kg/ha)	Humidity (%)		1,000-grain weight (13%)	Yield 13% (g)	Yield Kg/ha
	R1.2	75	119				T1	R1	164.89	4192.16	12.1		166.374	4229.89	3916.56
	R1.3	77	79					R2	141.39	4429.35	11.6		143.369	4491.36	4158.67
	R1.4	77	80					R3	145.98	4155.91	12.5		146.71	4176.69	3867.31
	R1.5	74	48					R4	148.7	4482.68	12.2		149.89	4518.54	4183.83
	R1.6	83	110					R5	139.8	4290.41	11.8		141.478	4341.89	4020.27
	R1.7	80	60										149.564	4351.68	4029.33
	R1.8	71	88				T2	R1	133.06	3805.09	13.5		132.395	3786.06	3505.62
	R1.9	84	97					R2	128.32	3412.36	14.4		126.524	3364.59	3115.36
	R1.10	77	63					R3	139.23	3807.08	12.2		140.344	3837.54	3553.27
	R1.11	80	74					R4	136.5	4350.5	16		132.405	4219.98	3907.39
	R1.12	82	70					R5	131.35	3104	12.9		131.481	3107.1	2876.95
	R1.13	77	68										132.445	3663.06	3391.72
	R1.14	76	56
	R1.15	78	76
	R1.16	77	86			Cultivar = BMX POTÊNCIA RR
	R1.17	71	51			T1 = Healthy Plants
	R1.18	73	48			T2 = CPMMV-infected
	R1.19	77	67
	R1.20	84	76
	R1.21	78	98
	R1.22	83	92
	R1.23	78	131
	R1.24	81	74
	R1.25	75	82
	R1.26	80	73
	R1.27	84	78
	R1.28	81	48
	R1.29	80	79
	R1.30	78	63
	R1.31	81	106
	R1.32	82	69
	R1.33	76	88
	R1.34	75	114
	R1.35	80	85
	R1.36	80	56
	R1.37	72	113
	R1.38	77	91
	R1.39	80	88
	R1.40	79	50
	R1.41	82	80
	R1.42	83	103
	R1.43	76	87
	R1.44	72	71
	R1.45	78	67
	R1.46	73	123
	R1.47	76	50
	R1.48	87	101
	R1.49	83	73
	R1.50	87	135
	R1.51	82	114
	R1.52	87	87
	R1.53	82	67
	R1.54	79	74
	R1.55	82	59
	R1.56	80	95
	R1.57	80	130
	R1.58	82	96
	R1.59	74	69
	R1.60	74	49
	R1.61	74	61
	R1.62	67	44
	R1.63	73	61
	R1.64	71	44
	R1.65	75	69
	R1.66	82	66
	R1.67	84	55
	R1.68	82	68
	R1.69	85	50
	R1.70	89	63
	R1.71	76	31
	R1.72	78	45
	R1.73	79	60
	R1.74	80	73
	R1.75	83	54
	R1.76	80	54
	R1.77	78	69
	R1.78	81	53
	R1.79	81	94
	R1.80	81	110
	R1.81	79	165
	R1.82	75	155
	R1.83	76	68
	R1.84	84	82
	R1.85	81	121
	R1.86	82	93
	R1.87	84	83
	R1.88	84	107
	R1.89	80	119
	R1.90	82	71
	R1.91	75	73
	R1.92	79	112
	R1.93	73	88
	R1.94	77	87
	R1.95	84	69
	R1.96	72	155
	R1.97	77	80
	R1.98	79	185
	R1.99	76	74
	R1.100	77	69
T2	R2.1	54	47
	R2.2	59	59
	R2.3	63	29
	R2.4	50	70
	R2.5	69	20
	R2.6	64	38
	R2.7	55	32
	R2.8	55	43
	R2.9	62	51
	R2.10	56	35
	R2.11	61	15
	R2.12	60	26
	R2.13	58	60
	R2.14	56	69
	R2.15	62	25
	R2.16	57	45
	R2.17	65	57
	R2.18	60	60
	R2.19	66	35
	R2.20	50	43
	R2.21	67	68
	R2.22	68	33
	R2.23	70	37
	R2.24	64	52
	R2.25	52	46
	R2.26	63	40
	R2.27	56	42
	R2.28	65	43
	R2.29	60	49
	R2.30	58	29
	R2.31	63	39
	R2.32	63	30
	R2.33	64	61
	R2.34	67	31
	R2.35	63	37
	R2.36	61	43
	R2.37	65	38
	R2.38	59	48
	R2.39	65	28
	R2.40	60	62
	R2.41	56	37
	R2.42	57	53
	R2.43	61	75
	R2.44	63	42
	R2.45	65	44
	R2.46	66	37
	R2.47	69	31
	R2.48	67	25
	R2.49	65	46
	R2.50	61	25
	R2.51	62	37
	R2.52	66	32
	R2.53	64	53
	R2.54	56	39
	R2.55	59	49
	R2.56	53	47
	R2.57	59	32
	R2.58	61	44
	R2.59	55	43
	R2.60	58	30
	R2.61	60	26
	R2.62	64	70
	R2.63	65	38
	R2.64	54	42
	R2.65	55	35
	R2.66	50	28
	R2.67	50	27
	R2.68	52	36
	R2.69	53	26
	R2.70	59	46
	R2.71	65	30
	R2.72	64	42
	R2.73	53	21
	R2.74	58	40
	R2.75	60	59
	R2.76	60	26
	R2.77	62	64
	R2.78	70	40
	R2.79	52	23
	R2.80	65	20
	R2.81	63	43
	R2.82	64	42
	R2.83	59	35
	R2.84	68	29
	R2.85	58	42
	R2.86	68	35
	R2.87	62	56
	R2.88	64	35
	R2.89	66	41
	R2.90	63	26
	R2.91	60	27
	R2.92	55	33
	R2.93	59	45
	R2.94	60	69
	R2.95	60	39
	R2.96	65	33
	R2.97	61	35
	R2.98	65	30
	R2.99	50	36
	R2.100	57	25

## Sheet: Field 2 Mogi Mirim
	M6410							TMG7062
		Plant Height (cm)	N° pods per plant						Plant Height (cm)	N° pods per plant					1,000-graind weight (g)	Yield (kg/ha)	Humidity (%)			1,000-graind weight (g)	Yield (kg/ha)	Humidity (%)
M6410	R1.1	58	63			TMG 7062	T1	R1.1	62	57			M6410	T1R1	127.81	2721.15	10.1		131.516	131.516	2800.06	2592.65
	R1.2	88	68					R1.2	66	52				T1R2	151	2685.5	10.2		155.228	155.228	2760.69	2556.2
	R1.3	72	63					R1.3	72	63				T1R3	140	2611.1	9.7		144.62	144.62	2697.27	2497.47
	R1.4	63	39					R1.4	62	37				T1R4	124.81	2557.68	10		128.554	128.554	2634.41	2439.27
	R1.5	68	40					R1.5	53	44				T1R5	132.7	2861.41	9.8		136.946	136.946	2952.98	2734.24
	R1.6	72	50					R1.6	75	30										139.373	2769.08	2563.96
	R1.7	66	60					R1.7	65	34				T2R1	122.22	2476	10		125.887	125.887	2550.28	2361.37
	R1.8	63	58					R1.8	69	43				T2R2	117.65	2537.19	10.1		121.062	121.062	2610.77	2417.38
	R1.9	66	56					R1.9	66	46				T2R3	124.39	2157.57	9.8		128.37	128.37	2226.61	2061.68
	R1.10	64	38					R1.10	61	30				T2R4	128.03	2480.63	10.2		131.615	131.615	2550.09	2361.19
	R1.11	70	57					R1.11	62	29				T2R5	134.16	2562.02	9.6		138.721	138.721	2649.13	2452.9
	R1.12	73	60					R1.12	65	26										129.131	2517.38	2330.9
	R1.13	78	42					R1.13	66	33										10.242	251.706	233.061
	R1.14	72	54					R1.14	69	27			TMG 7062	T1R1	180.39	2745.12	9.9		185.982	185.982	2830.22	2620.57
	R1.15	71	58					R1.15	75	22				T1R2	152.7	2574.22	10		157.281	157.281	2651.45	2455.04
	R1.16	66	58					R1.16	63	42				T1R3	198.7	2578.6	9.7		205.257	205.257	2663.69	2466.38
	R1.17	66	137					R1.17	72	40				T1R4	188	2195.25	9.6		194.392	194.392	2269.89	2101.75
	R1.18	61	67					R1.18	71	33				T1R5	181.55	2448.91	9.8		187.36	187.36	2527.28	2340.07
	R1.19	59	43					R1.19	70	25										186.054	2588.5	2396.76
	R1.20	62	52					R1.20	56	28				T2R1	157.55	2269.85	9.9		162.434	162.434	2340.22	2166.87
	R1.21	70	67					R1.21	77	27				T2R2	156.88	2391.63	10.3		161.116	161.116	2456.2	2274.26
	R1.22	68	52					R1.22	66	46				T2R3	161.45	2341.2	10		166.293	166.293	2411.44	2232.81
	R1.23	75	81					R1.23	62	27				T2R4	159.66	2058.02	9.8		164.769	164.769	2123.88	1966.55
	R1.24	72	71					R1.24	61	31				T2R5	185.1	2187.34	10.1		190.468	190.468	2250.77	2084.05
	R1.25	68	75					R1.25	61	33										169.016	2316.5	2144.91
	R1.26	71	115					R1.26	68	27										17.0383	272.004	251.855
	R1.27	77	55					R1.27	64	34
	R1.28	77	51					R1.28	61	27
	R1.29	62	54					R1.29	62	19
	R1.30	67	61					R1.30	63	30
	R1.31	66	193					R1.31	68	35
	R1.32	70	50					R1.32	69	26
	R1.33	72	50					R1.33	67	20
	R1.34	65	87					R1.34	70	27
	R1.35	67	67					R1.35	70	35
	R1.36	61	65					R1.36	67	22
	R1.37	68	48					R1.37	65	25
	R1.38	63	50					R1.38	68	34
	R1.39	68	58					R1.39	65	59
	R1.40	68	93					R1.40	66	26
	R1.41	62	56					R1.41	69	36
	R1.42	64	53					R1.42	65	32
	R1.43	75	96					R1.43	74	34
	R1.44	68	82					R1.44	75	31
	R1.45	64	91					R1.45	70	42
	R1.46	61	57					R1.46	64	25
	R1.47	74	45					R1.47	65	26
	R1.48	66	52					R1.48	65	22
	R1.49	68	70					R1.49	61	33
	R1.50	66	63					R1.50	68	45
	R1.51	66	72					R1.51	68	40
	R1.52	62	50					R1.52	63	41
	R1.53	71	117					R1.53	69	46
	R1.54	71	50					R1.54	76	41
	R1.55	76	53					R1.55	62	54
	R1.56	69	46					R1.56	56	28
	R1.57	67	242					R1.57	54	16
	R1.58	62	70					R1.58	64	30
	R1.59	61	83					R1.59	65	26
	R1.60	63	128					R1.60	63	30
	R1.61	68	79					R1.61	64	26
	R1.62	73	68					R1.62	66	20
	R1.63	80	75					R1.63	69	40
	R1.64	76	68					R1.64	68	36
	R1.65	72	122					R1.65	70	44
	R1.66	72	82					R1.66	62	35
	R1.67	74	54					R1.67	59	40
	R1.68	82	88					R1.68	60	37
	R1.69	76	60					R1.69	65	39
	R1.70	77	63					R1.70	66	37
	R1.71	71	74					R1.71	70	42
	R1.72	66	101					R1.72	63	26
	R1.73	69	45					R1.73	65	47
	R1.74	67	88					R1.74	66	41
	R1.75	67	119					R1.75	70	30
	R1.76	66	83					R1.76	69	41
	R1.77	69	50					R1.77	53	33
	R1.78	68	52					R1.78	57	41
	R1.79	62	55					R1.79	70	24
	R1.80	68	56					R1.80	71	28
	R1.81	64	61					R1.81	64	28
	R1.82	64	61					R1.82	69	32
	R1.83	64	60					R1.83	64	19
	R1.84	72	110					R1.84	75	44
	R1.85	72	52					R1.85	65	33
	R1.86	62	40					R1.86	72	32
	R1.87	60	66					R1.87	72	25
	R1.88	67	41					R1.88	71	33
	R1.89	66	107					R1.89	64	29
	R1.90	76	55					R1.90	65	25
	R1.91	71	62					R1.91	72	35
	R1.92	69	70					R1.92	70	40
	R1.93	71	52					R1.93	65	37
	R1.94	70	103					R1.94	82	40
	R1.95	73	61					R1.95	84	22
	R1.96	68	55					R1.96	74	72
	R1.97	75	68					R1.97	74	20
	R1.98	70	33					R1.98	76	40
	R1.99	72	112					R1.99	72	40
	R1.100	73	82					R1.100	77	40
	R2.1	71	47				T2	R2.1	80	17
	R2.2	61	38					R2.2	70	32
	R2.3	56	40					R2.3	68	20
	R2.4	60	28					R2.4	62	30
	R2.5	52	63					R2.5	75	30
	R2.6	53	21					R2.6	65	51
	R2.7	59	39					R2.7	77	31
	R2.8	64	37					R2.8	75	37
	R2.9	64	52					R2.9	74	21
	R2.10	65	40					R2.10	71	33
	R2.11	59	38					R2.11	67	26
	R2.12	63	45					R2.12	68	37
	R2.13	61	73					R2.13	68	27
	R2.14	69	49					R2.14	60	30
	R2.15	55	55					R2.15	69	35
	R2.16	53	47					R2.16	65	22
	R2.17	49	38					R2.17	72	28
	R2.18	58	58					R2.18	70	30
	R2.19	52	40					R2.19	68	31
	R2.20	65	55					R2.20	68	20
	R2.21	58	48					R2.21	71	13
	R2.22	60	52					R2.22	78	21
	R2.23	66	28					R2.23	75	40
	R2.24	60	41					R2.24	76	22
	R2.25	60	13					R2.25	74	32
	R2.26	66	34					R2.26	67	40
	R2.27	62	47					R2.27	58	42
	R2.28	60	44					R2.28	52	35
	R2.29	66	28					R2.29	66	33
	R2.30	58	53					R2.30	69	54
	R2.31	59	54					R2.31	68	23
	R2.32	64	51					R2.32	64	33
	R2.33	62	36					R2.33	67	25
	R2.34	62	43					R2.34	68	26
	R2.35	60	40					R2.35	68	35
	R2.36	50	28					R2.36	67	32
	R2.37	61	32					R2.37	68	31
	R2.38	69	38					R2.38	74	44
	R2.39	66	58					R2.39	70	46
	R2.40	59	68					R2.40	71	42
	R2.41	61	38					R2.41	69	18
	R2.42	53	27					R2.42	70	25
	R2.43	59	54					R2.43	74	22
	R2.44	48	45					R2.44	74	36
	R2.45	68	67					R2.45	67	28
	R2.46	62	21					R2.46	67	35
	R2.47	62	17					R2.47	73	17
	R2.48	61	58					R2.48	70	29
	R2.49	58	39					R2.49	63	15
	R2.50	49	67					R2.50	63	34
	R2.51	58	48					R2.51	67	9
	R2.52	66	42					R2.52	69	29
	R2.53	63	44					R2.53	70	31
	R2.54	63	21					R2.54	70	40
	R2.55	65	33					R2.55	70	31
	R2.56	60	38					R2.56	54	37
	R2.57	59	40					R2.57	65	21
	R2.58	58	22					R2.58	70	28
	R2.59	57	20					R2.59	70	65
	R2.60	60	32					R2.60	77	41
	R2.61	50	41					R2.61	77	31
	R2.62	56	57					R2.62	68	24
	R2.63	55	47					R2.63	75	50
	R2.64	60	33					R2.64	73	42
	R2.65	65	55					R2.65	66	45
	R2.66	55	44					R2.66	71	25
	R2.67	50	45					R2.67	73	27
	R2.68	60	31					R2.68	61	34
	R2.69	65	35					R2.69	63	30
	R2.70	65	36					R2.70	66	30
	R2.71	51	45					R2.71	64	32
	R2.72	57	42					R2.72	62	37
	R2.73	56	41					R2.73	64	45
	R2.74	60	50					R2.74	63	44
	R2.75	59	34					R2.75	65	35
	R2.76	58	32					R2.76	62	24
	R2.77	69	38					R2.77	63	30
	R2.78	66	31					R2.78	62	64
	R2.79	56	15					R2.79	67	35
	R2.80	60	44					R2.80	65	24
	R2.81	55	14					R2.81	65	18
	R2.82	60	35					R2.82	64	23
	R2.83	64	70					R2.83	62	19
	R2.84	56	30					R2.84	66	34
	R2.85	60	33					R2.85	66	16
	R2.86	58	53					R2.86	73	25
	R2.87	62	36					R2.87	58	26
	R2.88	61	31					R2.88	61	28
	R2.89	63	44					R2.89	64	18
	R2.90	65	83					R2.90	67	27
	R2.91	62	17					R2.91	65	36
	R2.92	60	37					R2.92	67	26
	R2.93	57	36					R2.93	70	17
	R2.94	58	27					R2.94	67	45
	R2.95	58	62					R2.95	64	30
	R2.96	56	14					R2.96	49	30
	R2.97	65	43					R2.97	65	30
	R2.98	55	43					R2.98	66	24
	R2.99	56	77					R2.99	49	51
	R2.100	60	33					R2.100	40	13

## Sheet: Field 3 Pedra Preta
M8372						M7739							1,000-graind weight (g)	Yield (kg/ha)	Humidity (%)			1,000-grain weight (13%)	Yield 13% (g)	Yield Kg/ha
		Plant Height (cm)	N° pods per plant				Plant Height (cm)	N° pods per plant			M8372	T1R1	124.63	3055	14.4		122.885	122.885	3012.23	2789.1
T1	R1.1	79.5	40		T1	R1.1	77	36				T1R2	119.58	3640	16.4		115.514	115.514	3516.24	3255.78
	R1.2	92.5	44			R1.2	80	34				T1R3	122.48	3645	14.7		120.398	120.398	3583.03	3317.62
	R1.3	72.5	40			R1.3	82	36				T1R4	140.26	3795	15.1		137.315	137.315	3715.31	3440.1
	R1.4	100.5	50			R1.4	80	36				T1R5	126.25	3736	16.2		122.21	122.21	3616.45	3348.56
	R1.5	85	54			R1.5	85	66										123.664	3488.65	3230.23
	R1.6	90	43			R1.6	90	50				T2R1	117.58	3505	15.1		115.111	115.111	3431.4	3177.22
	R1.7	80.5	38			R1.7	80	29				T2R2	120.59	3670	14.4		118.902	118.902	3618.62	3350.57
	R1.8	87.5	51			R1.8	77	88				T2R3	118.16	3475	14.15		116.801	116.801	3435.04	3180.59
	R1.9	62.5	89			R1.9	75	28				T2R4	124.73	3205	14.3		123.109	123.109	3163.34	2929.01
	R1.10	79	37			R1.10	75	41				T2R5	124.19	2930	15.5		121.085	121.085	2856.75	2645.14
	R1.11	79.5	22			R1.11	74	52										119.001	3301.03	3056.51
	R1.12	77	20			R1.12	58	36					1,000-graind weight (g)	Yield (kg/ha)	Humidity (%)			1,000-grain weight (13%)	Yield 13% (g)	Yield Kg/ha
	R1.13	77.5	53			R1.13	67	53			M7739	T1R1	153.38	3750	15.5		149.546	149.546	3656.25	3385.42
	R1.14	80	36			R1.14	75	61				T1R2	146.84	3225	16.5		141.701	141.701	3112.12	2881.6
	R1.15	77.5	26			R1.15	68	38				T1R3	150.21	3780	15		147.206	147.206	3704.4	3430
	R1.16	64.5	12			R1.16	73	47				T1R4	148.04	3845	15.7		144.043	144.043	3741.18	3464.06
	R1.17	79	64			R1.17	70	44				T1R5	145.29	3810	15		142.384	142.384	3733.8	3457.22
	R1.18	90	46			R1.18	72	40										144.976	3589.55	3323.66
	R1.19	79	18			R1.19	66	37				T2R1	148.81	2640	15.7		144.792	144.792	2568.72	2378.44
	R1.20	92	26			R1.20	68	87				T2R2	149.76	3535	16		145.267	145.267	3428.95	3174.95
	R1.21	75	71			R1.21	75	55				T2R3	140.9	3370	16.1		136.532	136.532	3265.53	3023.64
	R1.22	85	81			R1.22	67	46				T2R4	153.26	3390	15.6		149.275	149.275	3301.86	3057.28
	R1.23	83.5	31			R1.23	73	43				T2R5	154.29	3435	14.6		151.821	151.821	3380.04	3129.67
	R1.24	74	71			R1.24	68	59										145.538	3189.02	2952.8
	R1.25	87.5	69			R1.25	70	45
	R1.26	77.5	70			R1.26	73	61
	R1.27	82	27			R1.27	78	30
	R1.28	93	53			R1.28	75	52
	R1.29	79	61			R1.29	73	40
	R1.30	82.5	50			R1.30	75	37
	R1.31	76.5	54			R1.31	70	44
	R1.32	77	59			R1.32	70	35
	R1.33	81	60			R1.33	80	29
	R1.34	76.5	37			R1.34	67	55
	R1.35	74.5	73			R1.35	70	53
	R1.36	97	49			R1.36	87	33
	R1.37	84	37			R1.37	72	47
	R1.38	84	63			R1.38	70	64
	R1.39	83	39			R1.39	62	54
	R1.40	83	57			R1.40	67	36
	R1.41	79	46			R1.41	62	36
	R1.42	87	54			R1.42	62	41
	R1.43	84	23			R1.43	66	50
	R1.44	81	48			R1.44	63	39
	R1.45	87	49			R1.45	65	30
	R1.46	89	36			R1.46	63	40
	R1.47	89	94			R1.47	60	35
	R1.48	100	96			R1.48	59	23
	R1.49	98	64			R1.49	60	40
	R1.50	100	43			R1.50	71	31
	R1.51	92	93			R1.51	75	27
	R1.52	94	75			R1.52	67	35
	R1.53	95	50			R1.53	75	26
	R1.54	76	91			R1.54	70	31
	R1.55	88	61			R1.55	69	67
	R1.56	94	71			R1.56	66	39
	R1.57	86	47			R1.57	70	53
	R1.58	85	51			R1.58	70	50
	R1.59	85	49			R1.59	68	37
	R1.60	85	81			R1.60	73	40
	R1.61	94	75			R1.61	66	68
	R1.62	80	47			R1.62	64	38
	R1.63	100	54			R1.63	62	35
	R1.64	85	40			R1.64	66	65
	R1.65	92	47			R1.65	65	24
	R1.66	84	47			R1.66	70	53
	R1.67	100	59			R1.67	72	25
	R1.68	87	41			R1.68	76	38
	R1.69	85	49			R1.69	73	45
	R1.70	84	43			R1.70	64	32
	R1.71	90	44			R1.71	68	34
	R1.72	90	71			R1.72	62	33
	R1.73	92	42			R1.73	62	44
	R1.74	87	60			R1.74	63	45
	R1.75	83	49			R1.75	66	42
	R1.76	93	42			R1.76	80	62
	R1.77	76	60			R1.77	73	33
	R1.78	84	40			R1.78	78	28
	R1.79	90	72			R1.79	88	40
	R1.80	99	71			R1.80	70	25
	R1.81	88	44			R1.81	73	28
	R1.82	81	26			R1.82	70	71
	R1.83	97	48			R1.83	80	26
	R1.84	74	48			R1.84	73	33
	R1.85	80	32			R1.85	70	43
	R1.86	90	26			R1.86	67	43
	R1.87	83	46			R1.87	77	64
	R1.88	100	53			R1.88	60	33
	R1.89	92	64			R1.89	60	52
	R1.90	87	30			R1.90	66	45
	R1.91	75	42			R1.91	72	32
	R1.92	82	43			R1.92	69	44
	R1.93	94	79			R1.93	76	24
	R1.94	94	47			R1.94	69	29
	R1.95	93	46			R1.95	76	85
	R1.96	95	45			R1.96	77	32
	R1.97	84	16			R1.97	74	34
	R1.98	87	33			R1.98	76	32
	R1.99	87	59			R1.99	70	56
	R1.100	75	59			R1.100	73	47
T2	R2.1	90	32		T2	R2.1	77	91
	R2.2	96	36			R2.2	75	81
	R2.3	91	37			R2.3	77	51
	R2.4	100	61			R2.4	78	55
	R2.5	87	50			R2.5	85	50
	R2.6	82	69			R2.6	80	61
	R2.7	83	26			R2.7	83	48
	R2.8	94	40			R2.8	79	52
	R2.9	99	47			R2.9	80	41
	R2.10	97	33			R2.10	77	38
	R2.11	87	34			R2.11	87	54
	R2.12	96	37			R2.12	86	48
	R2.13	76	46			R2.13	83	52
	R2.14	68	34			R2.14	85	43
	R2.15	83	40			R2.15	76	48
	R2.16	83	58			R2.16	75	59
	R2.17	100	37			R2.17	74	31
	R2.18	100	32			R2.18	82	63
	R2.19	94	27			R2.19	78	56
	R2.20	91	52			R2.20	84	48
	R2.21	82	49			R2.21	80	46
	R2.22	99	37			R2.22	82	34
	R2.23	94	17			R2.23	75	58
	R2.24	74	45			R2.24	78	28
	R2.25	70	32			R2.25	80	32
	R2.26	65	43			R2.26	72	38
	R2.27	83	33			R2.27	72	47
	R2.28	74	50			R2.28	80	50
	R2.29	78	53			R2.29	87	29
	R2.30	88	61			R2.30	80	35
	R2.31	70	42			R2.31	72	23
	R2.32	87	37			R2.32	72	42
	R2.33	67	44			R2.33	74	45
	R2.34	84	39			R2.34	73	32
	R2.35	88	54			R2.35	70	34
	R2.36	85	36			R2.36	75	35
	R2.37	85	28			R2.37	78	37
	R2.38	83	47			R2.38	78	30
	R2.39	84	40			R2.39	70	17
	R2.40	96	34			R2.40	84	33
	R2.41	85	55			R2.41	72	50
	R2.42	86	25			R2.42	64	37
	R2.43	95	65			R2.43	76	55
	R2.44	91	49			R2.44	80	50
	R2.45	80	41			R2.45	72	59
	R2.46	87	56			R2.46	64	43
	R2.47	87	58			R2.47	94	43
	R2.48	75	57			R2.48	70	41
	R2.49	92	63			R2.49	80	53
	R2.50	88	39			R2.50	74	42
	R2.51	89	36			R2.51	63	59
	R2.52	84	39			R2.52	75	60
	R2.53	93	48			R2.53	76	36
	R2.54	81	33			R2.54	80	44
	R2.55	72	46			R2.55	78	38
	R2.56	83	36			R2.56	80	60
	R2.57	77	49			R2.57	74	52
	R2.58	77	88			R2.58	74	33
	R2.59	81	49			R2.59	84	38
	R2.60	89	60			R2.60	80	27
	R2.61	88	43			R2.61	73	51
	R2.62	86	59			R2.62	75	58
	R2.63	87	38			R2.63	79	45
	R2.64	89	30			R2.64	71	53
	R2.65	87	41			R2.65	80	38
	R2.66	96	45			R2.66	80	49
	R2.67	97	53			R2.67	70	45
	R2.68	75	47			R2.68	77	40
	R2.69	88	35			R2.69	70	34
	R2.70	87	40			R2.70	72	43
	R2.71	88	71			R2.71	70	52
	R2.72	87	32			R2.72	62	30
	R2.73	84	42			R2.73	66	29
	R2.74	97	42			R2.74	65	37
	R2.75	96	53			R2.75	75	86
	R2.76	90	72			R2.76	70	60
	R2.77	88	30			R2.77	74	27
	R2.78	87	38			R2.78	65	83
	R2.79	88	55			R2.79	65	42
	R2.80	94	34			R2.80	70	66
	R2.81	90	51			R2.81	80	54
	R2.82	85	53			R2.82	75	53
	R2.83	86	57			R2.83	70	30
	R2.84	95	46			R2.84	72	36
	R2.85	100	52			R2.85	68	58
	R2.86	87	38			R2.86	70	62
	R2.87	82	25			R2.87	74	38
	R2.88	85	36			R2.88	62	48
	R2.89	84	51			R2.89	66	44
	R2.90	90	46			R2.90	67	52
	R2.91	94	52			R2.91	73	38
	R2.92	89	52			R2.92	72	62
	R2.93	94	61			R2.93	70	46
	R2.94	96	37			R2.94	82	37
	R2.95	94	39			R2.95	80	37
	R2.96	83	39			R2.96	67	34
	R2.97	90	35			R2.97	68	50
	R2.98	100	35			R2.98	68	34
	R2.99	81	49			R2.99	60	30
	R2.100	75	49			R2.100	60	42

## Sheet: Field 4 Planaltina
	M9144
		Plant Height (cm)
T1	R1.1	120
	R1.2	144			M9144
	R1.3	127			Yield	Plant Height (cm)	U (%)	Pods/Plant (Mean)
	R1.4	145		T1	2219.96	125.95	11.4	62.25
	R1.5	129			2664.37	119	11.5	77.95
	R1.6	130			2298.97	122.95	11.5	60.5
	R1.7	112			2201.1	120.7	11.8	52.45
	R1.8	118			2430.92	116.75	11.5	54.85
	R1.9	125		T2	1866.6	115.95	11	29.95
	R1.10	122			2072.63	131.2	10.9	45.45
	R1.11	125			2283.17	126.75	11.3	44.15
	R1.12	121			2219.91	115.25	10.7	32.7
	R1.13	120			2659.8	124.35	10.7	60
	R1.14	125
	R1.15	116
	R1.16	134
	R1.17	128
	R1.18	112
	R1.19	143
	R1.20	123
	R1.21	116
	R1.22	110
	R1.23	119
	R1.24	105
	R1.25	127
	R1.26	138
	R1.27	129
	R1.28	114
	R1.29	111
	R1.30	110
	R1.31	142
	R1.32	121
	R1.33	143
	R1.34	115
	R1.35	119
	R1.36	109
	R1.37	102
	R1.38	131
	R1.39	104
	R1.40	115
	R1.41	126
	R1.42	122
	R1.43	135
	R1.44	143
	R1.45	149
	R1.46	132
	R1.47	115
	R1.48	125
	R1.49	139
	R1.50	111
	R1.51	103
	R1.52	146
	R1.53	145
	R1.54	114
	R1.55	91
	R1.56	92
	R1.57	126
	R1.58	116
	R1.59	115
	R1.60	114
	R1.61	139
	R1.62	128
	R1.63	127
	R1.64	130
	R1.65	105
	R1.66	111
	R1.67	116
	R1.68	102
	R1.69	118
	R1.70	127
	R1.71	130
	R1.72	115
	R1.73	135
	R1.74	129
	R1.75	114
	R1.76	113
	R1.77	120
	R1.78	125
	R1.79	112
	R1.80	118
	R1.81	119
	R1.82	128
	R1.83	110
	R1.84	120
	R1.85	122
	R1.86	111
	R1.87	109
	R1.88	120
	R1.89	122
	R1.90	110
	R1.91	130
	R1.92	113
	R1.93	114
	R1.94	117
	R1.95	118
	R1.96	110
	R1.97	112
	R1.98	126
	R1.99	120
	R1.100	104
T2	R2.1	108
	R2.2	115
	R2.3	111
	R2.4	117
	R2.5	138
	R2.6	123
	R2.7	104
	R2.8	100
	R2.9	108
	R2.10	106
	R2.11	137
	R2.12	110
	R2.13	123
	R2.14	149
	R2.15	110
	R2.16	112
	R2.17	109
	R2.18	113
	R2.19	116
	R2.20	110
	R2.21	150
	R2.22	110
	R2.23	145
	R2.24	130
	R2.25	123
	R2.26	110
	R2.27	155
	R2.28	138
	R2.29	128
	R2.30	114
	R2.31	133
	R2.32	130
	R2.33	150
	R2.34	148
	R2.35	127
	R2.36	133
	R2.37	140
	R2.38	131
	R2.39	119
	R2.40	110
	R2.41	140
	R2.42	140
	R2.43	120
	R2.44	114
	R2.45	127
	R2.46	130
	R2.47	134
	R2.48	134
	R2.49	131
	R2.50	90
	R2.51	137
	R2.52	100
	R2.53	124
	R2.54	116
	R2.55	136
	R2.56	129
	R2.57	150
	R2.58	130
	R2.59	140
	R2.60	113
	R2.61	102
	R2.62	120
	R2.63	110
	R2.64	112
	R2.65	115
	R2.66	150
	R2.67	110
	R2.68	103
	R2.69	105
	R2.70	110
	R2.71	110
	R2.72	118
	R2.73	123
	R2.74	110
	R2.75	128
	R2.76	120
	R2.77	111
	R2.78	113
	R2.79	115
	R2.80	120
	R2.81	126
	R2.82	115
	R2.83	116
	R2.84	130
	R2.85	120
	R2.86	140
	R2.87	120
	R2.88	118
	R2.89	128
	R2.90	120
	R2.91	140
	R2.92	124
	R2.93	117
	R2.94	114
	R2.95	111
	R2.96	135
	R2.97	127
	R2.98	147
	R2.99	117
	R2.100	122
